# Supplementary material
Source: publisher figshare collection journal article supplement (https://asha.figshare.com/articles/dataset/_/18372086)
Supplement: Supplementary file 1 [file 1]

**Supplemental Material S1.** Citations of included review studies.

|    |                                                                                                                                                                                                                                                                                                                                                                                                                        |
|----|------------------------------------------------------------------------------------------------------------------------------------------------------------------------------------------------------------------------------------------------------------------------------------------------------------------------------------------------------------------------------------------------------------------------|
| 1  | Adam, O., Mac Donald, C. L., Rivet, D., Ritter, J., May, T., Barefield, M., Duckworth, J., LaBarge, D., Asher, D., Drinkwine, B., Woods, Y., Connor, M., & Brody, D. L. (2015). Clinical and imaging assessment of acute combat mild traumatic brain injury in Afghanistan. <i>Neurology</i> , 85(3), 219-227. <a href="https://doi.org/10.1212/wnl.0000000000001758">https://doi.org/10.1212/wnl.0000000000001758</a> |
| 2  | Arfanakis, K., Haughton, V. M., Carew, J. D., Rogers, B. P., Dempsey, R. J., & Meyerand, M. E. (2002). Diffusion tensor MR imaging in diffuse axonal injury. <i>American Journal of Neuroradiology</i> , 23(5), 794-802.                                                                                                                                                                                               |
| 3  | Berisha, V., Wang, S., LaCross, A., Liss, J., & Garcia-Filion, P. (2017). Longitudinal changes in linguistic complexity among professional football players. <i>Brain and Language</i> , 169, 57-63. <a href="https://doi.org/10.1016/j.bandl.2017.02.003">https://doi.org/10.1016/j.bandl.2017.02.003</a>                                                                                                             |
| 4  | Chabok, S. Y., Kapourchali, S. R., Leili, E. K., Saberi, A., & Mohtasham-Amiri, Z. (2012). Effective factors on linguistic disorder during acute phase following traumatic brain injury in adults. <i>Neuropsychologia</i> , 50(7), 1444-1450. <a href="https://doi.org/10.1016/j.neuropsychologia.2012.02.029">https://doi.org/10.1016/j.neuropsychologia.2012.02.029</a>                                             |
| 5  | Coelho, C., Ylvisaker, M., & Turkstra, L. S. (2005). Nonstandardized assessment approaches for individuals with traumatic brain injuries. <i>Seminars in Speech and Language</i> , 26(04), 223-241. <a href="https://doi.org/10.1055/s-2005-922102">https://doi.org/10.1055/s-2005-922102</a>                                                                                                                          |
| 6  | Coles, J. P., Fryer, T. D., Smielewski, P., Rice, K., Clark, J. C., Pickard, J. D., & Menon, D. K. (2004). Defining ischemic burden after traumatic brain injury using 15O PET imaging of cerebral physiology. <i>Journal of Cerebral Blood Flow &amp; Metabolism</i> , 24(2), 191-201. <a href="https://doi.org/10.1097/01.wcb.0000100045.07481.de">https://doi.org/10.1097/01.wcb.0000100045.07481.de</a>            |
| 7  | Cooper, D. B., Mercado-Couch, J. M., Critchfield, E., Kennedy, J., Vanderploeg, R. D., DeVillibis, C., & Gaylord, K. M. (2010). Factors influencing cognitive functioning following mild traumatic brain injury in OIF/OEF burn patients. <i>NeuroRehabilitation</i> , 26(3), 233-238. <a href="https://doi.org/10.3233/nre-2010-0559">https://doi.org/10.3233/nre-2010-0559</a>                                       |
| 8  | Covassin, T., Elbin, R., Harris, W., Parker, T., & Kontos, A. (2012). The role of age and sex in symptoms, neurocognitive performance, and postural stability in athletes after concussion. <i>The American Journal of Sports Medicine</i> , 40(6), 1303-1312. <a href="https://doi.org/10.1177/0363546512444554">https://doi.org/10.1177/0363546512444554</a>                                                         |
| 9  | Croall, I. D., Cowie, C. J., He, J., Peel, A., Wood, J., Aribisala, B. S., Mitchell, P., Mendelow, A. D., Smith, F. E., Millar, D., Kelly, T., & Blamire, A. M. (2014). White matter correlates of cognitive dysfunction after mild traumatic brain injury. <i>Neurology</i> , 83(6), 494-501. <a href="https://doi.org/10.1212/wnl.0000000000000666">https://doi.org/10.1212/wnl.0000000000000666</a>                 |
| 10 | Dall'Acqua, P., Johannes, S., Mica, L., Simmen, H.-P., Glaab, R., Fandino, J., ... Hänggi, J. (2017). Functional and structural network recovery after mild traumatic brain injury: A 1-year longitudinal study. <i>Frontiers in Human Neuroscience</i> , 11, 1-16. <a href="https://doi.org/10.3389/fnhum.2017.00280">https://doi.org/10.3389/fnhum.2017.00280</a>                                                    |
| 11 | Daniell, B., Bernitt, C., Walton, S. R., Malin, S. K., & Resch, J. E. (2020). Changes in metabolism and caloric intake after sport concussion: A case series. <i>Translational Journal of the American College of Sports Medicine</i> , 5(12), 1-6. <a href="https://doi.org/10.1249/tjx.0000000000000129">https://doi.org/10.1249/tjx.0000000000000129</a>                                                            |
| 12 | De Guise, E., LeBlanc, J., Feyz, M., & Lamoureux, J. (2006). Prediction of outcome at discharge from acute care following traumatic brain injury. <i>Journal of Head Trauma Rehabilitation</i> , 21(6), 527-536. <a href="https://doi.org/10.1097/00001199-200611000-00007">https://doi.org/10.1097/00001199-200611000-00007</a>                                                                                       |
| 13 | De Monte, V. E., Geffen, G. M., & Massavelli, B. M. (2006). The effects of post-traumatic amnesia on information processing following mild traumatic brain injury. <i>Brain Injury</i> , 20(13-14), 1345-1354. <a href="https://doi.org/10.1080/080269905000108207">https://doi.org/10.1080/080269905000108207</a>                                                                                                     |
| 14 | De Simoni, S., Grover, P. J., Jenkins, P. O., Honeyfield, L., Quest, R. A., Ross, E., Scott, G., Wilson, M. H., Majewska, P., Waldman, A. D., Patel, M. C., & Sharp, D. J. (2016). Disconnection between the default mode network and medial temporal lobes in post-traumatic amnesia. <i>Brain</i> , 139(12), 3137-3150. <a href="https://doi.org/10.1093/brain/aww241">https://doi.org/10.1093/brain/aww241</a>      |

|    |                                                                                                                                                                                                                                                                                                                                                                                                                                                                                    |
|----|------------------------------------------------------------------------------------------------------------------------------------------------------------------------------------------------------------------------------------------------------------------------------------------------------------------------------------------------------------------------------------------------------------------------------------------------------------------------------------|
| 15 | Downing, M., Bragge, P., & Ponsford, J. (2018). Cognitive rehabilitation following traumatic brain injury: A survey of current practice in Australia. <i>Brain Impairment</i> , 20(1), 24–36. <a href="https://doi.org/10.1017/brimp.2018.12">https://doi.org/10.1017/brimp.2018.12</a>                                                                                                                                                                                            |
| 16 | Dreer, L. E., DeVivo, M. J., Novack, T. A., Krzywanski, S., & Marson, D. C. (2008). Cognitive predictors of medical decision-making capacity in traumatic brain injury. <i>Rehabilitation Psychology</i> , 53(4), 486–497. <a href="https://doi.org/10.1037/a0013798">https://doi.org/10.1037/a0013798</a>                                                                                                                                                                         |
| 17 | Farace, E., & Alves, W. M. (2000). Do women fare worse: A metaanalysis of gender differences in traumatic brain injury outcome. <i>Journal of Neurosurgery</i> , 93(4), 539–545. <a href="https://doi.org/10.3171/jns.2000.93.4.0539">https://doi.org/10.3171/jns.2000.93.4.0539</a>                                                                                                                                                                                               |
| 18 | Feltrin, F. S., Zaninotto, A. L., Guirado, V. M., Macruz, F., Sakuno, D., Dalaqua, M., Magalhaes, L. G. A., Paiva, W. S., Andrade, A. F. D., Otaduy, M. C. G., & Leite, C. C. (2018). Longitudinal changes in brain volumetry and cognitive functions after moderate and severe diffuse axonal injury. <i>Brain Injury</i> , 32(11), 1413–1422. <a href="https://doi.org/10.1080/02699052.2018.1494852">https://doi.org/10.1080/02699052.2018.1494852</a>                          |
| 19 | Gauthier, S., Leblanc, J., Seresova, A., Laberge-Poirier, A., Correa, J. A., Alturki, A. Y., Marcoux, J., Maleki, M., Feyz, M., & De Guise, E. (2018). Acute prediction of outcome and cognitive-communication impairments following traumatic brain injury: The influence of age, education and site of lesion. <i>Journal of Communication Disorders</i> , 73, 77– 90. <a href="https://doi.org/10.1016/j.jcomdis.2018.04.003">https://doi.org/10.1016/j.jcomdis.2018.04.003</a> |
| 20 | Ghawami, H., Sadeghi, S., Raghbi, M., & Rahimi-Movaghar, V. (2016). Executive functioning of complicated-mild to moderate traumatic brain injury patients with frontal contusions. <i>Applied Neuropsychology: Adult</i> , 24(4), 299–307. <a href="https://doi.org/10.1080/23279095.2016.115707">https://doi.org/10.1080/23279095.2016.115707</a>                                                                                                                                 |
| 21 | Hawley, C., Sakr, M., Scapinello, S., Salvo, J., & Wrenn, P. (2017). Traumatic brain injuries in older adults– 6 years of data for one UK trauma centre: Retrospective analysis of prospectively collected data. <i>Emergency Medicine Journal</i> , 34(8), 509–516. <a href="https://doi.org/10.1136/emered-2016-206506">https://doi.org/10.1136/emered-2016-206506</a>                                                                                                           |
| 22 | Hill, E., Claessen, M., Whitworth, A., Boyes, M., & Ward, R. (2018). Discourse and cognition in speakers with acquired brain injury (ABI): A systematic review. <i>International Journal of Language &amp; Communication Disorders</i> , 53(4), 689–717. <a href="https://doi.org/10.1111/1460-6984.12394">https://doi.org/10.1111/1460-6984.12394</a>                                                                                                                             |
| 23 | Hobson, E., Lannin, N. A., Taylor, A., Farquhar, M., Morarty, J., & Unsworth, C. (2015). Determining client cognitive status following mild traumatic brain injury. <i>Scandinavian Journal of Occupational Therapy</i> , 23(2), 138–146. <a href="https://doi.org/10.3109/11038128.2015.1082622">https://doi.org/10.3109/11038128.2015.1082622</a>                                                                                                                                |
| 24 | Inoue, Y., Shiozaki, T., Tasaki, O., Hayakata, T., Ikegawa, H., Yoshiya, K., Fujinaka, T., Tanaka, H., Shimazu, & Sugimoto, H. (2005). Changes in cerebral blood flow from the acute to the chronic phase of severe head injury. <i>Journal of Neurotrauma</i> , 22(12), 1411–1418. <a href="https://doi.org/10.1089/neu.2005.22.1411">https://doi.org/10.1089/neu.2005.22.1411</a>                                                                                                |
| 25 | Johnson, L., Lundgren, K., Henrich, V., Phillips, S., (2020). Factors influencing recovery from mild traumatic brain injury. <i>Brain Injury</i> , 23, 1202–1212. <a href="https://doi.org/10.1080/02699052.2020.1795719">https://doi.org/10.1080/02699052.2020.1795719</a>                                                                                                                                                                                                        |
| 26 | Johnston, J. J. (2007). The Galasko Report implemented: The role of emergency medicine in the management of head injuries. <i>European Journal of Emergency Medicine</i> , 14(3), 130–133. <a href="https://doi.org/10.1097/mej.0b013e32801219a6">https://doi.org/10.1097/mej.0b013e32801219a6</a>                                                                                                                                                                                 |
| 27 | Knollman-Porter, K., Constantinidou, F., Beardslee, J., Dailey, S. (2019). Multidisciplinary management of collegiate sports-related concussions. <i>Seminars in Speech and Language</i> , 40(01), 003–012. <a href="https://doi.org/10.1055/s-0038-1676363">https://doi.org/10.1055/s-0038-1676363</a>                                                                                                                                                                            |
| 28 | Kushner, D. S., & Johnson-Greene, D. (2014). Changes in cognition and continence as predictors of rehabilitation outcomes in individuals with severe traumatic brain injury. <i>Journal of Rehabilitation Research and Development</i> , 51(7), 1057–1068. <a href="https://doi.org/10.1682/jrrd.2014.01.0002">https://doi.org/10.1682/jrrd.2014.01.0002</a>                                                                                                                       |
| 29 | Larres, D. T., Carr, W., Gonzales, E. G., & Hawley, J. S. (2016). The natural history of acute recovery of blast-induced mild traumatic brain injury: A case series during war. <i>Military Medicine</i> , 181(5S), 23–27. <a href="https://doi.org/10.7205/milmed-d-15-00152">https://doi.org/10.7205/milmed-d-15-00152</a>                                                                                                                                                       |
| 30 | LeBlanc, J., De Guise, E., Champoux, M., Couturier, C., Lamoureux, J., Marcoux, J., Maleki, M., & Feyz, M. (2014). Acute evaluation of conversational discourse skills in traumatic brain injury. <i>International</i>                                                                                                                                                                                                                                                             |

|    |                                                                                                                                                                                                                                                                                                                                                                                                                                                                                                                                                                               |
|----|-------------------------------------------------------------------------------------------------------------------------------------------------------------------------------------------------------------------------------------------------------------------------------------------------------------------------------------------------------------------------------------------------------------------------------------------------------------------------------------------------------------------------------------------------------------------------------|
|    | <i>Journal of Speech-Language Pathology</i> , 16(6), 582-593.<br><a href="https://doi.org/10.3109/17549507.2013.871335">https://doi.org/10.3109/17549507.2013.871335</a>                                                                                                                                                                                                                                                                                                                                                                                                      |
| 31 | Lee, B., Bennett, L. L., Bernick, C., Shan, G., & Banks, S. J. (2019). The relations among depression, cognition, and brain volume in professional boxers: A preliminary examination using brief clinical measures. <i>Journal of Head Trauma Rehabilitation</i> , 34(6).<br><a href="https://doi.org/10.1097/htr.0000000000000495">https://doi.org/10.1097/htr.0000000000000495</a>                                                                                                                                                                                          |
| 32 | Lippa, S. M., Agbayani, K. A., Hawes, S., Jokic, E., & Caroselli, J. S. (2014). Effort in acute traumatic brain injury: Considering more than pass/fail. <i>Rehabilitation Psychology</i> , 59(3), 306-312.<br><a href="https://doi.org/10.1037/a0037217">https://doi.org/10.1037/a0037217</a>                                                                                                                                                                                                                                                                                |
| 33 | Mayer, A. R., Ling, J., Mannell, M. V., Gasparovic, C., Phillips, J. P., Doezeema, D., Reichard, R., & Yeo, R. A. (2010). A prospective diffusion tensor imaging study in mild traumatic brain injury. <i>Neurology</i> , 74(8), 643-650. <a href="https://doi.org/10.1212/wnl.0b013e3181d0ccdd">https://doi.org/10.1212/wnl.0b013e3181d0ccdd</a>                                                                                                                                                                                                                             |
| 34 | McCrea, M., Guskiewicz, K., Doncevic, S., Helmick, K., Kennedy, J., Boyd, C., Asmussen, S., Ahn, K. W., Wang, Y., Hoelzle, J., & Jaffee, M. (2014). Day of injury cognitive performance on the military acute concussion evaluation (MACE) by U.S. military service members in OEF/OIF. <i>Military Medicine</i> , 179(9), 990-997. <a href="https://doi.org/10.7205/milmed-d-13-00349">https://doi.org/10.7205/milmed-d-13-00349</a>                                                                                                                                         |
| 35 | McGlade, E., Rogowska, J., & Yurgelun-Todd, D. (2015). Sex differences in orbitofrontal connectivity in male and female veterans with TBI. <i>Brain Imaging and Behavior</i> , 9(3), 535-549.<br><a href="https://doi.org/10.1007/s11682-015-9379-3">https://doi.org/10.1007/s11682-015-9379-3</a>                                                                                                                                                                                                                                                                            |
| 36 | McLafferty, F. S., Barmparas, G., Ortega, A., Roberts, P., Ko, A., Harada, M., Nuno, M., Black, K. L., & Ley, E. J. (2016). Predictors of improved functional outcome following inpatient rehabilitation for patients with traumatic brain injury. <i>NeuroRehabilitation</i> , 39(3), 423-430.<br><a href="https://doi.org/10.3233/nre-161373">https://doi.org/10.3233/nre-161373</a>                                                                                                                                                                                        |
| 37 | McMahon, P. J., Hricik, A., Yue, J. K., Puccio, A. M., Inoue, T., Lingsma, H. F., Beers, S. R., Gordon, W. A., Valadka, A. B., Manley, G. T., Okonkwo, D. O., Casey, S. S., Cooper, S. R., Dames-O'Connor, K., Menon, D. K., Sorani, M. D., Yuh, E. L., Mukherjee, P., Schnyer, D. M., & Vassar, M. J. (2014). Symptomatology and functional outcome in mild traumatic brain injury: Results from the Prospective TRACK-TBI Study. <i>Journal of Neurotrauma</i> , 31(1), 26-33.<br><a href="https://doi.org/10.1089/neu.2013.2984">https://doi.org/10.1089/neu.2013.2984</a> |
| 38 | Miles, L., Grossman, R. I., Johnson, G., Babb, J. S., Diller, L., & Inglese, M. (2008). Short-term DTI predictors of cognitive dysfunction in mild traumatic brain injury. <i>Brain Injury</i> , 22(2), 115-122.<br><a href="https://doi.org/10.1080/02699050801888816">https://doi.org/10.1080/02699050801888816</a>                                                                                                                                                                                                                                                         |
| 39 | MRC Crash Trial Collaborators. (2008). Predicting outcome after traumatic brain injury: Practical prognostic models based on large cohort of international patients. <i>BMJ</i> , 336(7641), 425-429.<br><a href="https://doi.org/10.1136/bmj.39461.643438.25">https://doi.org/10.1136/bmj.39461.643438.25</a>                                                                                                                                                                                                                                                                |
| 40 | Munivenkatappa, A., Agrawal, A., Shukla, D., Kumaraswamy, D., & Devi, B. (2016). Traumatic brain injury: Does gender influence outcomes? <i>International Journal of Critical Illness and Injury Science</i> , 6(2), 70-73. <a href="https://doi.org/10.4103/2229-5151.183024">https://doi.org/10.4103/2229-5151.183024</a>                                                                                                                                                                                                                                                   |
| 41 | Nakase-Richardson, R., Sherer, M., Seel, R. T., Hart, T., Hanks, R., Arango-Lasprilla, J. C., Yablon, S. A., Sander, A. M., Barnett, S. D., Walker, W. C., & Hammond, F. (2011). Utility of post-traumatic amnesia in predicting 1-year productivity following traumatic brain Injury: Comparison of the Russell and Mississippi PTA classification intervals. <i>Journal of Neurology, Neurosurgery &amp; Psychiatry</i> , 82(5), 494-499. <a href="https://doi.org/10.1136/jnnp.2010.222489">https://doi.org/10.1136/jnnp.2010.222489</a>                                   |
| 42 | Nakase-Thompson, R., Sherer, M., Yablon, S. A., Nick, T. G., & Trzepacz, P. T. (2004). Acute confusion following traumatic brain injury. <i>Brain Injury</i> , 18(2), 131-142.<br><a href="https://doi.org/10.1080/0269905031000149542">https://doi.org/10.1080/0269905031000149542</a>                                                                                                                                                                                                                                                                                       |
| 43 | Niogi, S. N., & Mukherjee, P. (2010). Diffusion tensor imaging of mild traumatic brain injury. <i>Journal of Head Trauma Rehabilitation</i> , 25(4), 241-255. <a href="https://doi.org/10.1097/htr.0b013e3181e52c2a">https://doi.org/10.1097/htr.0b013e3181e52c2a</a>                                                                                                                                                                                                                                                                                                         |
| 44 | Oehr, L., & Anderson, J. (2017). Diffusion-tensor imaging findings and cognitive function following hospitalized mixed-mechanism mild traumatic brain injury: A systematic review and meta-analysis.                                                                                                                                                                                                                                                                                                                                                                          |

|    |                                                                                                                                                                                                                                                                                                                                                                                                                                                                                       |
|----|---------------------------------------------------------------------------------------------------------------------------------------------------------------------------------------------------------------------------------------------------------------------------------------------------------------------------------------------------------------------------------------------------------------------------------------------------------------------------------------|
|    | <i>Archives of Physical Medicine and Rehabilitation</i> , 98(11), 2308–2319.<br><a href="https://doi.org/10.1016/j.apmr.2017.03.019">https://doi.org/10.1016/j.apmr.2017.03.019</a>                                                                                                                                                                                                                                                                                                   |
| 45 | Oertel, M., Boscardin, W. J., Obrist, W. D., Glenn, T. C., McArthur, D. L., Gravari, T., Lee, J. H., Martin, N. A. (2005). Posttraumatic vasospasm: The epidemiology, severity, and time course of an underestimated phenomenon: A prospective study performed in 299 patients. <i>Journal of Neurosurgery</i> , 103(5), 812-824. <a href="https://doi.org/10.3171/jns.2005.103.5.0812">https://doi.org/10.3171/jns.2005.103.5.0812</a>                                               |
| 46 | Oh, H., & Seo, W. (2009). Functional and cognitive recovery of patients with traumatic brain injury. <i>Critical Care Nurse</i> , 29(4), 12-22. <a href="https://doi.org/10.4037/ccn2009279">https://doi.org/10.4037/ccn2009279</a>                                                                                                                                                                                                                                                   |
| 47 | O'Keefe, E., Kelly, E., Liu, Y., Giordano, C., Wallace, E., Hynes, M., ... Campbell, M. (2020). Dynamic blood–brain barrier regulation in mild traumatic brain injury. <i>Journal of Neurotrauma</i> , 37(2), 347–356. <a href="https://doi.org/10.1089/neu.2019.6483">https://doi.org/10.1089/neu.2019.6483</a>                                                                                                                                                                      |
| 48 | Ponsford, J., Bayley, M., Wiseman-Hakes, C., Togher, L., Velikonja, D., McIntyre, A., Janzen, S., & Tate, R. (2014). INCOG recommendations for management of cognition following traumatic brain injury, part II. <i>Journal of Head Trauma Rehabilitation</i> , 29(4), 321–337. <a href="https://doi.org/10.1097/htr.0000000000000072">https://doi.org/10.1097/htr.0000000000000072</a>                                                                                              |
| 49 | Ponsford, J., Janzen, S., McIntyre, A., Bayley, M., Velikonja, D., & Tate, R. (2014). INCOG recommendations for management of cognition following traumatic brain injury, part I. <i>Journal of Head Trauma Rehabilitation</i> , 29(4), 307–320. <a href="https://doi.org/10.1097/htr.0000000000000074">https://doi.org/10.1097/htr.0000000000000074</a>                                                                                                                              |
| 50 | Rodríguez-Baeza, A., Torre, F. R.-D. L., Poca, A., Martí, M., & Garnacho, A. (2003). Morphological features in human cortical brain microvessels after head injury: A three-dimensional and immunocytochemical study. <i>The Anatomical Record Part A: Discoveries in Molecular, Cellular, and Evolutionary Biology</i> , 273A(1), 583–593. <a href="https://doi.org/10.1002/ar.a.10069">https://doi.org/10.1002/ar.a.10069</a>                                                       |
| 51 | Rohling, M. L., Binder, L. M., Demakis, G. J., Larrabee, G. J., Ploetz, D. M., & Langhinrichsen-Rohling, J. (2011). A meta-analysis of neuropsychological outcome after mild traumatic brain injury: Re-analyses and reconsiderations of Binder et al. (1997), Frencham et al. (2005), and Pertab et al. (2009). <i>The Clinical Neuropsychologist</i> , 25(4), 608-623. <a href="https://doi.org/10.1080/13854046.2011.565076">https://doi.org/10.1080/13854046.2011.565076</a>      |
| 52 | Schumacher, R., Walder, B., Delhumeau, C., & Müri, R. M. (2016). Predictors of inpatient (neuro)rehabilitation after acute care of severe traumatic brain injury: An epidemiological study. <i>Brain Injury</i> , 30(10), 1186–1193. <a href="https://doi.org/10.1080/02699052.2016.1183821">https://doi.org/10.1080/02699052.2016.1183821</a>                                                                                                                                        |
| 53 | Sherer, M., Yablon, S. A., & Nakase-Richardson, R. (2009). Patterns of recovery of posttraumatic confusional state in neurorehabilitation admissions after traumatic brain injury. <i>Archives of Physical Medicine and Rehabilitation</i> , 90(10), 1749-1754. <a href="https://doi.org/10.1016/j.apmr.2009.05.011">https://doi.org/10.1016/j.apmr.2009.05.011</a>                                                                                                                   |
| 54 | Shores, E.A., Lammel, A., Hullick, C., Sheedy, J., Flynn, M., Levick, W., & Batchelor, J. (2008). The diagnostic accuracy of the Revised Westmead PTA scale as an adjunct to the Glasgow Coma Scale in the early identification of cognitive impairment in patients with mild traumatic brain injury. <i>Journal of Neurology, Neurosurgery &amp; Psychiatry</i> , 79(10), 1100-1106. <a href="https://doi.org/10.1136/jnnp.2007.132571">https://doi.org/10.1136/jnnp.2007.132571</a> |
| 55 | Shumskaya, E., Andriessen, T. M., Norris, D. G., & Vos, P. E. (2012). Abnormal whole-brain functional networks in homogeneous acute mild traumatic brain injury. <i>Neurology</i> , 79(2), 175-182. <a href="https://doi.org/10.1212/wnl.0b013e31825f04fb">https://doi.org/10.1212/wnl.0b013e31825f04fb</a>                                                                                                                                                                           |
| 56 | Smith, C., Gentleman, S. M., Leclercq, P. D., Murray, L. S., Griffin, W. S., Graham, D. I., & Nicoll, J. A. (2013). The neuroinflammatory response in humans after traumatic brain injury. <i>Neuropathology and Applied Neurobiology</i> , 39(6), 654–666. <a href="https://doi.org/10.1111/nan.12008">https://doi.org/10.1111/nan.12008</a>                                                                                                                                         |
| 57 | Smith, D. H., & Meaney, D. F. (2000). Axonal damage in traumatic brain injury. <i>The Neuroscientist</i> , 6(6), 483–495. <a href="https://doi.org/10.1177/107385840000600611">https://doi.org/10.1177/107385840000600611</a>                                                                                                                                                                                                                                                         |
| 58 | Steel, J., Ferguson, A., Spencer, E., & Togher, L. (2013). Speech pathologists' current practice with cognitive-communication assessment during post-traumatic amnesia: A survey. <i>Brain Injury</i> , 27(7-8), 819-830. <a href="https://doi.org/10.3109/02699052.2013.775492">https://doi.org/10.3109/02699052.2013.775492</a>                                                                                                                                                     |

|    |                                                                                                                                                                                                                                                                                                                                                                                                                                                    |
|----|----------------------------------------------------------------------------------------------------------------------------------------------------------------------------------------------------------------------------------------------------------------------------------------------------------------------------------------------------------------------------------------------------------------------------------------------------|
| 59 | Steel, J., Ferguson, A., Spencer, E., & Togher, L. (2016). Speech-language pathologists' perspectives on cognitive communication assessment during post-traumatic amnesia. <i>Brain Injury</i> , 30(9), 1131-1142. <a href="https://doi.org/10.1080/02699052.2016.1174785">https://doi.org/10.1080/02699052.2016.1174785</a>                                                                                                                       |
| 60 | Susman, M., Dirusso, S. M., Sullivan, T., Risucci, D., Nealon, P., Cuff, S., Haider, A. & Benzil, D. (2002). Traumatic brain injury in the elderly: Increased mortality and worse functional outcome at discharge despite lower injury severity. <i>Journal of Trauma</i> , 53(2), 219–224. <a href="https://doi.org/10.1097/00005373-200208000-00004">https://doi.org/10.1097/00005373-200208000-00004</a>                                        |
| 61 | Sveen, U., Bautz-Holter, E., Sandvik, L., Alvsåker, K., & Røe, C. (2010). Relationship between competency in activities, injury severity, and post-concussion symptoms after traumatic brain injury. <i>Scandinavian Journal of Occupational Therapy</i> , 17(3), 225-232. <a href="https://doi.org/10.3109/11038120903171295">https://doi.org/10.3109/11038120903171295</a>                                                                       |
| 62 | Tate, R. L., Godbee, K., & Sigmundsdottir, L. (2013). A systematic review of assessment tools for adults used in traumatic brain injury research and their relationship to the ICF. <i>NeuroRehabilitation</i> , 32(4), 729-750. <a href="https://doi.org/10.3233/nre-130898">https://doi.org/10.3233/nre-130898</a>                                                                                                                               |
| 63 | Tate, R., Kennedy, M., Ponsford, J., Douglas, J., Velikonja, D., Bayley, M., & Stergiou-Kita, M. (2014). INCOG recommendations for management of cognition following traumatic brain injury, part III. <i>Journal of Head Trauma Rehabilitation</i> , 29(4), 338–352. <a href="https://doi.org/10.1097/htr.000000000000068">https://doi.org/10.1097/htr.000000000000068</a>                                                                        |
| 64 | Tate, R. L., Perdices, M., Pfaff, A., & Jurjevic, L. (2001). Predicting duration of posttraumatic amnesia (PTA) from early PTA measurements. <i>Journal of Head Trauma Rehabilitation</i> , 16(6), 525-542. <a href="https://doi.org/10.1097/00001199-200112000-00002">https://doi.org/10.1097/00001199-200112000-00002</a>                                                                                                                        |
| 65 | Tate, R. L., Pfaff, A., Baguley, I. J., Marosszeky, J. E., Gurka, J. A., Hodgkinson, A. E., King, C., Lane-Brown, A. T., & Hanna, J. (2006). A multicentre, randomised trial examining the effect of test procedures measuring emergence from post-traumatic amnesia. <i>Journal of Neurology, Neurosurgery &amp; Psychiatry</i> , 77(7), 841-849. <a href="https://doi.org/10.1136/jnnp.2005.074989">https://doi.org/10.1136/jnnp.2005.074989</a> |
| 66 | Togher, L., Wiseman-Hakes, C., Douglas, J., Stergiou-Kita, M., Ponsford, J., Teasell, R., Bayley, M., & Turkstra, L. S. (2014). INCOG recommendations for management of cognition following traumatic brain injury, part IV. <i>Journal of Head Trauma Rehabilitation</i> , 29(4), 353–368. <a href="https://doi.org/10.1097/htr.000000000000071">https://doi.org/10.1097/htr.000000000000071</a>                                                  |
| 67 | Turkstra, L., Ylvisaker, M., Coelho, C., Kennedy, M., Sohlberg, M. M., Avery, J., & Yorkston, K. (2005). Practice guidelines for standardized assessment for persons with traumatic brain injury. <i>Journal of Medical Speech-Language Pathology</i> , 13(2), 9–38. <a href="https://www.ancds.org/assets/docs/EBP/turkstra2005.pdf">https://www.ancds.org/assets/docs/EBP/turkstra2005.pdf</a>                                                   |
| 68 | Veksler, R., Vazana, U., Serlin, Y., Prager, O., Ofer, J., Shemen, N., ... Friedman, A. (2020). Slow blood-to-brain transport underlies enduring barrier dysfunction in American football players. <i>Brain</i> , 143(6), 1826–1842. <a href="https://doi.org/10.1093/brain/awaa140">https://doi.org/10.1093/brain/awaa140</a>                                                                                                                     |
| 69 | Velikonja, D., Tate, R., Ponsford, J., McIntyre, A., Janzen, S., & Bayley, M. (2014). INCOG recommendations for management of cognition following traumatic brain injury, part V. <i>Journal of Head Trauma Rehabilitation</i> , 29(4), 369–386. <a href="https://doi.org/10.1097/htr.000000000000069">https://doi.org/10.1097/htr.000000000000069</a>                                                                                             |
| 70 | Vukovic, M., Vuksanovic, J., & Vukovic, I. (2008). Comparison of the recovery patterns of language and cognitive functions in patients with post-traumatic language processing deficits and in patients with aphasia following a stroke. <i>Journal of Communication Disorders</i> , 41(6), 531-552. <a href="https://doi.org/10.1016/j.jcomdis.2008.04.001">https://doi.org/10.1016/j.jcomdis.2008.04.001</a>                                     |
| 71 | Weir, N., Doig, E. J., Fleming, J. M., Wiemers, A., & Zemljic, C. (2006). Objective and behavioural assessment of the emergence from post-traumatic amnesia (PTA). <i>Brain Injury</i> , 20(9), 927-935. <a href="https://doi.org/10.1080/02699050600832684">https://doi.org/10.1080/02699050600832684</a>                                                                                                                                         |
| 72 | Wilcox, M. E., Brummel, N. E., Archer, K., Ely, E. W., Jackson, J. C., & Hopkins, R. O. (2013). Cognitive dysfunction in ICU patients: Risk factors, predictors, and rehabilitation interventions. <i>Critical Care Medicine</i> , 41, S81-98. <a href="https://doi.org/10.1097/ccm.0b013e3182a16946">https://doi.org/10.1097/ccm.0b013e3182a16946</a>                                                                                             |

|    |                                                                                                                                                                                                                                                                                                                                                                                                                                                                                                               |
|----|---------------------------------------------------------------------------------------------------------------------------------------------------------------------------------------------------------------------------------------------------------------------------------------------------------------------------------------------------------------------------------------------------------------------------------------------------------------------------------------------------------------|
| 73 | Wright, M. J., & Schmitter-Edgecombe, M. (2011). The impact of verbal memory encoding and consolidation deficits during recovery from moderate-to-severe traumatic brain injury. <i>Journal of Head Trauma Rehabilitation</i> , 26(3), 182–191. <a href="https://doi.org/10.1097/htr.0b013e318218dcf9">https://doi.org/10.1097/htr.0b013e318218dcf9</a>                                                                                                                                                       |
| 74 | Wu, Y.-C., Harezlak, J., Elsaid, N. M., Lin, Z., Wen, Q., Mustafi, S. M., Rikken, L. D., Koch, K. M., Nencka, A. S., Meier, T. B., Mayer, A. R., Wang, Y., Giza, C. C., DiFiori, J. P., Guskiewicz, K. M., Mihalik, J. P., LaConte, S. M., Duma, S. M., Broglio, S. P., ... McAllister, T. W. (2020). Longitudinal white-matter abnormalities in sports-related concussion. <i>Neurology</i> , 95(7). <a href="https://doi.org/10.1212/wnl.0000000000009930">https://doi.org/10.1212/wnl.0000000000009930</a> |
| 75 | Xydakis, M. S., Mulligan, L. P., Smith, A. B., Olsen, C. H., Lyon, D. M., & Belluscio, L. (2015). Olfactory impairment and traumatic brain injury in blast-injured combat troops: A cohort study. <i>Neurology</i> , 84(15), 1559–1567. <a href="https://doi.org/10.1212/wnl.0000000000001475">https://doi.org/10.1212/wnl.0000000000001475</a>                                                                                                                                                               |
